# Supplementary material for: First Isolation of Pseudogymnoascus destructans, the Fungal Causative Agent of White-Nose Syndrome, in Korean Bats (Myotis petax)
Source: MDPI journal article supplement (doi:10.3390/jof8101072), 2022-10-12
Supplement: s1 [file s1]

**Table S1.** Captured bats information.

| No | Bat Species               | Sex | Province          | City      |
|----|---------------------------|-----|-------------------|-----------|
| 1  | Rhinolophus ferrumequinum | M   | Chungcheongnam-do | Gongju    |
| 2  | Rhinolophus ferrumequinum | F   | Chungcheongnam-do | Gongju    |
| 3  | Myotis petax              | M   | Chungcheongnam-do | Gongju    |
| 4  | Myotis petax              | M   | Chungcheongnam-do | Gongju    |
| 5  | Myotis aurascens          | F   | Chungcheongnam-do | Gongju    |
| 6  | Myotis aurascens          | M   | Chungcheongnam-do | Gongju    |
| 7  | Myotis aurascens          | F   | Chungcheongnam-do | Gongju    |
| 8  | Myotis aurascens          | F   | Chungcheongnam-do | Gongju    |
| 9  | Hypsugo alaschanicus      | M   | Chungcheongnam-do | Gongju    |
| 10 | Hypsugo alaschanicus      | F   | Chungcheongnam-do | Gongju    |
| 11 | Eptesicus serotinus       | M   | Chungcheongnam-do | Gongju    |
| 12 | Pipistrellus abramus      | F   | Chungcheongnam-do | Gongju    |
| 13 | Pipistrellus abramus      | F   | Chungcheongnam-do | Gongju    |
| 14 | Pipistrellus abramus      | F   | Chungcheongnam-do | Gongju    |
| 15 | Pipistrellus abramus      | U   | Chungcheongnam-do | Gongju    |
| 16 | Pipistrellus abramus      | M   | Chungcheongnam-do | Gongju    |
| 17 | Pipistrellus abramus      | M   | Chungcheongnam-do | Gongju    |
| 18 | Hypsugo alaschanicus      | F   | Chungcheongnam-do | Gongju    |
| 19 | Eptesicus serotinus       | F   | Jeollabuk-do      | Imsil     |
| 20 | Eptesicus serotinus       | F   | Jeollabuk-do      | Imsil     |
| 21 | Eptesicus serotinus       | F   | Jeollabuk-do      | Imsil     |
| 22 | Myotis aurascens          | M   | Jeollabuk-do      | Imsil     |
| 23 | Rhinolophus ferrumequinum | M   | Jeollabuk-do      | Imsil     |
| 24 | Eptesicus serotinus       | F   | Jeollabuk-do      | Jangsu    |
| 25 | Pipistrellus abramus      | F   | Jeollabuk-do      | Jangsu    |
| 26 | Pipistrellus abramus      | M   | Jeollabuk-do      | Jangsu    |
| 27 | Pipistrellus abramus      | F   | Jeollabuk-do      | Jangsu    |
| 28 | Pipistrellus abramus      | F   | Jeollabuk-do      | Jangsu    |
| 29 | Pipistrellus abramus      | M   | Jeollabuk-do      | Jangsu    |
| 30 | Pipistrellus abramus      | F   | Jeollabuk-do      | Jangsu    |
| 31 | Pipistrellus abramus      | M   | Jeollabuk-do      | Jangsu    |
| 32 | Pipistrellus abramus      | F   | Jeollabuk-do      | Jangsu    |
| 33 | Eptesicus serotinus       | M   | Gyeongsangbuk-do  | Yeongyang |
| 34 | Eptesicus serotinus       | F   | Gyeongsangbuk-do  | Yeongyang |
| 35 | Eptesicus serotinus       | F   | Gyeongsangbuk-do  | Yeongyang |
| 36 | Eptesicus serotinus       | F   | Gyeongsangbuk-do  | Yeongyang |
| 37 | Eptesicus serotinus       | F   | Gyeongsangbuk-do  | Yeongyang |
| 38 | Eptesicus serotinus       | F   | Gyeongsangbuk-do  | Yeongyang |
| 39 | Eptesicus serotinus       | F   | Gyeongsangbuk-do  | Yeongyang |
| 40 | Eptesicus serotinus       | F   | Gyeongsangbuk-do  | Yeongyang |
| 41 | Myotis aurascens          | M   | Gyeongsangbuk-do  | Yeongyang |
| 42 | Myotis aurascens          | M   | Gyeongsangbuk-do  | Yeongyang |
| 43 | Myotis aurascens          | M   | Gyeongsangbuk-do  | Yeongyang |
| 44 | Myotis petax              | F   | Gyeongsangbuk-do  | Goryeong  |
| 45 | Myotis petax              | F   | Gyeongsangbuk-do  | Goryeong  |
| 46 | Myotis petax              | M   | Gyeongsangbuk-do  | Goryeong  |
| 47 | Myotis petax              | F   | Gyeongsangbuk-do  | Goryeong  |
| 48 | Myotis petax              | M   | Gyeongsangbuk-do  | Goryeong  |
| 49 | Myotis petax              | M   | Gyeongsangbuk-do  | Goryeong  |
| 50 | Myotis petax              | F   | Gyeongsangbuk-do  | Goryeong  |
| 51 | Myotis petax              | F   | Gyeongsangbuk-do  | Goryeong  |
| 52 | Myotis petax              | F   | Gyeongsangbuk-do  | Goryeong  |
| 53 | Myotis petax              | F   | Gyeongsangbuk-do  | Goryeong  |
| 54 | Myotis petax              | F   | Gyeongsangbuk-do  | Goryeong  |
| 55 | Myotis petax              | M   | Gyeongsangbuk-do  | Goryeong  |
| 56 | Myotis petax              | M   | Gyeongsangbuk-do  | Goryeong  |
| 57 | Rhinolophus ferrumequinum | F   | Gyeongsangbuk-do  | Goryeong  |
| 58 | Miniopterus schreibersi   | M   | Gyeongsangnam-do  | Hapcheon  |
| 59 | Myotis petax              | F   | Gyeongsangnam-do  | Hapcheon  |

|     |                           |   |                  |           |
|-----|---------------------------|---|------------------|-----------|
| 60  | Myotis petax              | F | Gyeongsangnam-do | Hapcheon  |
| 61  | Myotis petax              | F | Gyeongsangnam-do | Hapcheon  |
| 62  | Myotis petax              | M | Gyeongsangnam-do | Hapcheon  |
| 63  | Rhinolophus ferrumequinum | F | Gyeongsangnam-do | Hapcheon  |
| 64  | Myotis petax              | M | Gyeongsangbuk-do | Yeongyang |
| 65  | Myotis petax              | F | Gyeongsangbuk-do | Yeongyang |
| 66  | Myotis petax              | M | Gyeongsangbuk-do | Yeongyang |
| 67  | Rhinolophus ferrumequinum | M | Gyeongsangbuk-do | Yeongyang |
| 68  | Myotis aurascens          | F | Gyeongsangnam-do | Hapcheon  |
| 69  | Pipistrellus abramus      | M | Gyeongsangnam-do | Hapcheon  |
| 70  | Pipistrellus abramus      | M | Gyeongsangnam-do | Hapcheon  |
| 71  | Pipistrellus abramus      | F | Gyeongsangnam-do | Hapcheon  |
| 72  | Pipistrellus abramus      | F | Gyeongsangnam-do | Hapcheon  |
| 73  | Myotis petax              | M | Gyeongsangnam-do | Sancheong |
| 74  | Myotis petax              | M | Gyeongsangnam-do | Sancheong |
| 75  | Myotis petax              | M | Gyeongsangnam-do | Sancheong |
| 76  | Myotis petax              | M | Gyeongsangnam-do | Sancheong |
| 77  | Myotis petax              | F | Gyeongsangnam-do | Sancheong |
| 78  | Myotis petax              | M | Gyeongsangnam-do | Sancheong |
| 79  | Myotis petax              | F | Gyeongsangnam-do | Sancheong |
| 80  | Myotis petax              | M | Gyeongsangnam-do | Sancheong |
| 81  | Myotis petax              | M | Gyeongsangnam-do | Sancheong |
| 82  | Myotis petax              | M | Gyeongsangnam-do | Sancheong |
| 83  | Myotis petax              | M | Gyeongsangnam-do | Sancheong |
| 84  | Miniopterus schreibersi   | F | Gyeongsangnam-do | Sancheong |
| 85  | Miniopterus schreibersi   | M | Gyeongsangnam-do | Sancheong |
| 86  | Myotis petax              | M | Gyeongsangnam-do | Hapcheon  |
| 87  | Myotis petax              | F | Gyeongsangnam-do | Hapcheon  |
| 88  | Miniopterus schreibersi   | M | Gyeongsangnam-do | Hapcheon  |
| 89  | Miniopterus schreibersi   | F | Gyeongsangnam-do | Hapcheon  |
| 90  | Miniopterus schreibersi   | F | Gyeongsangnam-do | Hapcheon  |
| 91  | Miniopterus schreibersi   | F | Gyeongsangnam-do | Hapcheon  |
| 92  | Rhinolophus ferrumequinum | F | Gyeongsangnam-do | Hapcheon  |
| 93  | Myotis petax              | M | Gyeongsangbuk-do | Goryeong  |
| 94  | Myotis petax              | M | Gyeongsangbuk-do | Goryeong  |
| 95  | Myotis petax              | F | Gyeongsangbuk-do | Goryeong  |
| 96  | Rhinolophus ferrumequinum | F | Gyeongsangbuk-do | Goryeong  |
| 97  | Pipistrellus abramus      | F | Gyeonggi-do      | Pocheon   |
| 98  | Pipistrellus abramus      | M | Gyeonggi-do      | Pocheon   |
| 99  | Myotis aurascens          | M | Gyeonggi-do      | Pocheon   |
| 100 | Hypsugo alaschanicus      | M | Gyeonggi-do      | Pocheon   |
| 101 | Hypsugo alaschanicus      | M | Gyeonggi-do      | Pocheon   |
| 102 | Pipistrellus abramus      | M | Gyeonggi-do      | Pocheon   |
| 103 | Hypsugo alaschanicus      | M | Gyeonggi-do      | Pocheon   |
| 104 | Hypsugo alaschanicus      | M | Gyeonggi-do      | Pocheon   |
| 105 | Myotis aurascens          | M | Gyeonggi-do      | Pocheon   |
| 106 | Eptesicus serotinus       | F | Gyeonggi-do      | Pocheon   |
| 107 | Pipistrellus abramus      | M | Gyeonggi-do      | Pocheon   |
| 108 | Pipistrellus abramus      | M | Gyeonggi-do      | Pocheon   |
| 109 | Hypsugo alaschanicus      | M | Gyeonggi-do      | Pocheon   |
| 110 | Hypsugo alaschanicus      | F | Gyeonggi-do      | Pocheon   |
| 111 | Pipistrellus abramus      | F | Gyeongsangbuk-do | Gunwi     |
| 112 | Pipistrellus abramus      | M | Gyeongsangbuk-do | Gunwi     |
| 113 | Myotis aurascens          | M | Gyeongsangnam-do | Hadong    |
| 114 | Hypsugo alaschanicus      | F | Gyeongsangnam-do | Hadong    |
| 115 | Pipistrellus abramus      | M | Gyeongsangnam-do | Hadong    |
| 116 | Pipistrellus abramus      | M | Gyeongsangnam-do | Hadong    |
| 117 | Miniopterus schreibersi   | M | Jeollabuk-do     | Imsil     |
| 118 | Miniopterus schreibersi   | F | Jeollabuk-do     | Imsil     |
| 119 | Miniopterus schreibersi   | U | Jeollabuk-do     | Imsil     |
| 120 | Rhinolophus ferrumequinum | M | Jeollabuk-do     | Imsil     |

|     |                           |   |              |          |
|-----|---------------------------|---|--------------|----------|
| 121 | Miniopterus schreibersi   | F | Jeollabuk-do | Imsil    |
| 122 | Miniopterus schreibersi   | F | Jeollabuk-do | Imsil    |
| 123 | Miniopterus schreibersi   | F | Jeollabuk-do | Imsil    |
| 124 | Miniopterus schreibersi   | F | Jeollabuk-do | Imsil    |
| 125 | Miniopterus schreibersi   | F | Jeollabuk-do | Imsil    |
| 126 | Miniopterus schreibersi   | F | Jeollabuk-do | Imsil    |
| 127 | Miniopterus schreibersi   | F | Gangwon-do   | Hwacheon |
| 128 | Miniopterus schreibersi   | F | Gangwon-do   | Hwacheon |
| 129 | Miniopterus schreibersi   | F | Gangwon-do   | Hwacheon |
| 130 | Miniopterus schreibersi   | F | Gangwon-do   | Hwacheon |
| 131 | Miniopterus schreibersi   | F | Gangwon-do   | Hwacheon |
| 132 | Miniopterus schreibersi   | F | Gangwon-do   | Hwacheon |
| 133 | Rhinolophus ferrumequinum | F | Gangwon-do   | Hwacheon |
| 134 | Miniopterus schreibersi   | M | Gangwon-do   | Hwacheon |
| 135 | Miniopterus schreibersi   | F | Gangwon-do   | Hwacheon |
| 136 | Miniopterus schreibersi   | F | Gangwon-do   | Hwacheon |
| 137 | Miniopterus schreibersi   | M | Gangwon-do   | Hwacheon |
| 138 | Miniopterus schreibersi   | F | Gangwon-do   | Hwacheon |
| 139 | Miniopterus schreibersi   | F | Gangwon-do   | Inje     |
| 140 | Miniopterus schreibersi   | F | Gangwon-do   | Inje     |
| 141 | Miniopterus schreibersi   | F | Gangwon-do   | Inje     |
| 142 | Rhinolophus ferrumequinum | F | Gangwon-do   | Inje     |
| 143 | Miniopterus schreibersi   | F | Gangwon-do   | Inje     |
| 144 | Rhinolophus ferrumequinum | F | Gangwon-do   | Inje     |
| 145 | Miniopterus schreibersi   | F | Gangwon-do   | Inje     |
| 146 | Miniopterus schreibersi   | M | Gangwon-do   | Inje     |
| 147 | Rhinolophus ferrumequinum | M | Gangwon-do   | Inje     |
| 148 | Miniopterus schreibersi   | F | Jeollabuk-do | Jangsu   |
| 149 | Miniopterus schreibersi   | U | Jeollabuk-do | Jangsu   |
| 150 | Murina leucogaster        | F | Jeollabuk-do | Jangsu   |
| 151 | Rhinolophus ferrumequinum | M | Gangwon-do   | Hwacheon |
| 152 | Myotis macrodactylus      | M | Gangwon-do   | Hwacheon |
| 153 | Myotis macrodactylus      | M | Gangwon-do   | Hwacheon |
| 154 | Myotis macrodactylus      | M | Gangwon-do   | Hwacheon |
| 155 | Myotis macrodactylus      | M | Gangwon-do   | Hwacheon |
| 156 | Myotis macrodactylus      | M | Gangwon-do   | Hwacheon |
| 157 | Myotis macrodactylus      | M | Gangwon-do   | Hwacheon |
| 158 | Rhinolophus ferrumequinum | F | Gangwon-do   | Hwacheon |
| 159 | Myotis macrodactylus      | M | Gangwon-do   | Inje     |
| 160 | Myotis macrodactylus      | M | Gangwon-do   | Inje     |
| 161 | Myotis macrodactylus      | M | Gangwon-do   | Inje     |
| 162 | Myotis macrodactylus      | M | Gangwon-do   | Inje     |
| 163 | Myotis macrodactylus      | M | Gangwon-do   | Inje     |
| 164 | Myotis macrodactylus      | M | Gangwon-do   | Inje     |
| 165 | Myotis macrodactylus      | M | Gangwon-do   | Inje     |
| 166 | Myotis macrodactylus      | M | Gangwon-do   | Inje     |
| 167 | Myotis macrodactylus      | M | Gangwon-do   | Inje     |
| 168 | Myotis macrodactylus      | M | Gangwon-do   | Inje     |
| 169 | Rhinolophus ferrumequinum | M | Gangwon-do   | Inje     |
| 170 | Myotis macrodactylus      | M | Jeollabuk-do | Jangsu   |
| 171 | Myotis macrodactylus      | M | Jeollabuk-do | Jangsu   |
| 172 | Myotis macrodactylus      | M | Jeollabuk-do | Jangsu   |
| 173 | Myotis macrodactylus      | M | Jeollabuk-do | Jangsu   |
| 174 | Rhinolophus ferrumequinum | F | Jeollabuk-do | Jangsu   |
| 175 | Miniopterus schreibersi   | M | Jeollabuk-do | Jangsu   |
| 176 | Rhinolophus ferrumequinum | F | Jeollabuk-do | Jangsu   |
| 177 | Rhinolophus ferrumequinum | F | Jeollabuk-do | Jangsu   |
| 178 | Myotis macrodactylus      | M | Jeollabuk-do | Muju     |
| 179 | Myotis macrodactylus      | M | Jeollabuk-do | Muju     |
| 180 | Myotis macrodactylus      | M | Jeollabuk-do | Muju     |
| 181 | Myotis macrodactylus      | M | Jeollabuk-do | Muju     |

|     |                                  |   |                   |           |
|-----|----------------------------------|---|-------------------|-----------|
| 182 | <i>Myotis macrodactylus</i>      | M | Jeollabuk-do      | Muju      |
| 183 | <i>Miniopterus schreibersi</i>   | M | Jeollabuk-do      | Muju      |
| 184 | <i>Miniopterus schreibersi</i>   | M | Jeollabuk-do      | Muju      |
| 185 | <i>Myotis macrodactylus</i>      | M | Jeollabuk-do      | Muju      |
| 186 | <i>Myotis macrodactylus</i>      | M | Jeollabuk-do      | Muju      |
| 187 | <i>Myotis macrodactylus</i>      | M | Jeollabuk-do      | Muju      |
| 188 | <i>Myotis macrodactylus</i>      | M | Jeollabuk-do      | Muju      |
| 189 | <i>Myotis macrodactylus</i>      | M | Jeollabuk-do      | Muju      |
| 190 | <i>Myotis macrodactylus</i>      | M | Jeollabuk-do      | Muju      |
| 191 | <i>Rhinolophus ferrumequinum</i> | F | Jeollabuk-do      | Muju      |
| 192 | <i>Rhinolophus ferrumequinum</i> | F | Jeollabuk-do      | Muju      |
| 193 | <i>Rhinolophus ferrumequinum</i> | F | Jeollabuk-do      | Muju      |
| 194 | <i>Rhinolophus ferrumequinum</i> | F | Jeollabuk-do      | Imsil     |
| 195 | <i>Rhinolophus ferrumequinum</i> | F | Jeollabuk-do      | Imsil     |
| 196 | <i>Rhinolophus ferrumequinum</i> | F | Jeollabuk-do      | Imsil     |
| 197 | <i>Rhinolophus ferrumequinum</i> | F | Jeollabuk-do      | Imsil     |
| 198 | <i>Miniopterus schreibersi</i>   | F | Jeollabuk-do      | Imsil     |
| 199 | <i>Rhinolophus ferrumequinum</i> | F | Gyeongsangnam-do  | Sancheong |
| 200 | <i>Rhinolophus ferrumequinum</i> | F | Gyeongsangnam-do  | Sancheong |
| 201 | <i>Rhinolophus ferrumequinum</i> | F | Gyeongsangnam-do  | Sancheong |
| 202 | <i>Rhinolophus ferrumequinum</i> | M | Gyeongsangnam-do  | Sancheong |
| 203 | <i>Rhinolophus ferrumequinum</i> | F | Gyeongsangnam-do  | Sancheong |
| 204 | <i>Miniopterus schreibersi</i>   | M | Gyeongsangnam-do  | Sancheong |
| 205 | <i>Miniopterus schreibersi</i>   | F | Gyeongsangnam-do  | Sancheong |
| 206 | <i>Rhinolophus ferrumequinum</i> | M | Gyeongsangnam-do  | Yeongyang |
| 207 | <i>Rhinolophus ferrumequinum</i> | M | Gyeongsangnam-do  | Yeongyang |
| 208 | <i>Rhinolophus ferrumequinum</i> | M | Gyeongsangnam-do  | Yeongyang |
| 209 | <i>Rhinolophus ferrumequinum</i> | F | Gyeongsangnam-do  | Yeongyang |
| 210 | <i>Rhinolophus ferrumequinum</i> | F | Gyeongsangnam-do  | Yeongyang |
| 211 | <i>Rhinolophus ferrumequinum</i> | M | Gyeonggi-do       | Pocheon   |
| 212 | <i>Rhinolophus ferrumequinum</i> | M | Gyeonggi-do       | Pocheon   |
| 213 | <i>Rhinolophus ferrumequinum</i> | M | Gyeonggi-do       | Pocheon   |
| 214 | <i>Rhinolophus ferrumequinum</i> | M | Gyeonggi-do       | Pocheon   |
| 215 | <i>Rhinolophus ferrumequinum</i> | M | Gyeonggi-do       | Pocheon   |
| 216 | <i>Rhinolophus ferrumequinum</i> | F | Gyeongsangnam-do  | Hapcheon  |
| 217 | <i>Rhinolophus ferrumequinum</i> | M | Gyeongsangnam-do  | Hapcheon  |
| 218 | <i>Rhinolophus ferrumequinum</i> | M | Gyeongsangbuk-do  | Goryeong  |
| 219 | <i>Rhinolophus ferrumequinum</i> | M | Gyeongsangbuk-do  | Goryeong  |
| 220 | <i>Miniopterus schreibersi</i>   | M | Jeollabuk-do      | Muju      |
| 221 | <i>Rhinolophus ferrumequinum</i> | M | Chungcheongnam-do | Gongju    |
| 222 | <i>Rhinolophus ferrumequinum</i> | M | Chungcheongnam-do | Gongju    |
| 223 | <i>Miniopterus schreibersi</i>   | M | Jeollabuk-do      | Muju      |
| 224 | <i>Rhinolophus ferrumequinum</i> | M | Jeollabuk-do      | Muju      |
| 225 | <i>Rhinolophus ferrumequinum</i> | F | Jeollabuk-do      | Muju      |
| 226 | <i>Rhinolophus ferrumequinum</i> | F | Gyeongsangnam-do  | Hadong    |
| 227 | <i>Rhinolophus ferrumequinum</i> | F | Gyeongsangnam-do  | Hadong    |
| 228 | <i>Rhinolophus ferrumequinum</i> | F | Gyeongsangnam-do  | Hadong    |
| 229 | <i>Rhinolophus ferrumequinum</i> | M | Gyeongsangnam-do  | Hadong    |
| 230 | <i>Rhinolophus ferrumequinum</i> | M | Gyeongsangnam-do  | Hadong    |
| 231 | <i>Rhinolophus ferrumequinum</i> | F | Gyeongsangnam-do  | Hadong    |
| 232 | <i>Rhinolophus ferrumequinum</i> | F | Gyeongsangnam-do  | Hadong    |
| 233 | <i>Miniopterus schreibersi</i>   | F | Gyeongsangnam-do  | Hadong    |
| 234 | <i>Miniopterus schreibersi</i>   | F | Gyeongsangnam-do  | Hadong    |
| 235 | <i>Rhinolophus ferrumequinum</i> | F | Gyeongsangnam-do  | Hadong    |
| 236 | <i>Rhinolophus ferrumequinum</i> | F | Gyeongsangnam-do  | Hadong    |
| 237 | <i>Rhinolophus ferrumequinum</i> | M | Gyeongsangnam-do  | Hadong    |
| 238 | <i>Rhinolophus ferrumequinum</i> | F | Gyeongsangnam-do  | Hadong    |
| 239 | <i>Rhinolophus ferrumequinum</i> | F | Gyeongsangnam-do  | Hadong    |
| 240 | <i>Miniopterus schreibersi</i>   | M | Gyeongsangnam-do  | Hadong    |
| 241 | <i>Miniopterus schreibersi</i>   | M | Gyeongsangnam-do  | Hadong    |

**Table S2.** GenBank accession numbers of the sequences used in this study. Sequences highlighted in bold were generated in this study [1-4].

| No | Species                                | Strain                       | Locality              | Substrate /Host              | Accession No.                  |                                   |                                      |                                    |                                   |
|----|----------------------------------------|------------------------------|-----------------------|------------------------------|--------------------------------|-----------------------------------|--------------------------------------|------------------------------------|-----------------------------------|
|    |                                        |                              |                       |                              | ITS                            | LSU                               | MCM7                                 | RPB2                               | TEF1                              |
| 1  | <i>Pseudogymnoascus destructans</i>    | 20631-21 (ex-type)           | USA, New York         | <i>Myotis lucifugus</i>      | EU884921                       | KF017865                          | KF017691                             | KF017747                           | KF017806                          |
| 2  | <i>Geomyces auratus</i>                | CBS 108.14                   | Norway                | Soil, filter paper bait      | KF039895                       | KF017864                          | KF017690                             | KF017746                           | KF017805                          |
| 3  | <i>Leuconeurospora pulcherrima</i>     | CBS 343.76                   | Switzerland           | Forest Soil                  | KF049206                       | FJ176884                          | na                                   | FJ238367                           | FJ238409                          |
| 4  | <i>Pseudeurotium zonatum</i>           | CBS 329.36/<br>AFTOL-ID 1912 | France                | Soil near gas leakage        | AY129286                       | DQ470988                          | na                                   | DQ470940                           | DQ471112                          |
| 5  | <i>Pseudogymnoascus roseus</i>         | 03VT05                       | USA, Vermont          | Hibernacular soil            | KF039892                       | KF017820                          | KF017651                             | KF017705                           | KF017760                          |
| 6  | <i>Pseudogymnoascus roseus</i>         | 05NY06                       | USA, New York         | Hibernacular soil            | JX270385                       | KF017824                          | KF017655                             | KF017709                           | KF017764                          |
| 7  | <i>Pseudogymnoascus roseus</i>         | 05NY08                       | USA, New York         | Hibernacular soil            | JX270387                       | KF017825                          | KF017656                             | KF017710                           | KF017765                          |
| 8  | <i>Pseudogymnoascus palmeri</i>        | LHU407                       | USA, Pennsylvania     | Cave sediment                | MT988150                       | na                                | na                                   | MW054468                           | MW054467                          |
| 9  | <i>Pseudogymnoascus palmeri</i>        | WSF 3629                     | USA, Wisconsin        | Amorphus peat                | KF039897                       | KF017870                          | KF017696                             | KF017751                           | KF017811                          |
| 9  | <i>Pseudogymnoascus turneri</i>        | LHU121                       | USA, Pennsylvania     | Sediment                     | MN542213                       | na                                | na                                   | MN541380                           | MN541379                          |
| 10 | <i>Pseudogymnoascus turneri</i>        | Ps5                          | USA, Pennsylvania     | Sediment                     | MN542214                       | na                                | na                                   | MN541382                           | MN541381                          |
| 11 | <i>Pseudogymnoascus turneri</i>        | 23342-1-11                   | USA, Wisconsin        | <i>Perimyotis subflavus</i>  | JX415266                       | KF017868                          | KF017694                             | KF017749                           | KF017809                          |
| 12 | <i>Pseudogymnoascus lindneri</i>       | 02NH05                       | USA, New Hampshire    | Hibernacular soil            | JX270350                       | KF017818                          | KF017649                             | KF017703                           | KF017758                          |
| 13 | <i>Pseudogymnoascus lindneri</i>       | LHU158                       | USA, Pennsylvania     | Sediment                     | MN542212                       | na                                | na                                   | MN541384                           | MN541383                          |
| 14 | <i>Pseudogymnoascus appendiculatus</i> | 02NH11                       | USA, New Hampshire    | Hibernacular soil            | JX270356                       | KF017819                          | KF017650                             | KF017704                           | KF017759                          |
| 15 | <i>Pseudogymnoascus appendiculatus</i> | 07MA02                       | USA, Massachusetts    | Hibernacular soil            | JX270402                       | KF017827                          | KF017658                             | KF017712                           | KF017767                          |
| 16 | <i>Pseudogymnoascus pannorum</i>       | ATCC 16222                   | Germany, West Germany | Soil from wheat field        | AF015789                       | na                                | KF686777                             | na                                 | KF686766                          |
| 17 | <i>Pseudogymnoascus shaanxiensis</i>   | GZUIFR HZ5.7                 | China                 | Soil                         | MT509366                       | MT509380                          | MT534206                             | MT534220                           | MT534231                          |
| 18 | <i>Pseudogymnoascus yunnanensis</i>    | GZUIFR 21.807                | China                 | Soil                         | MZ444072                       | MZ444099                          | MZ490754                             | MZ488537                           | MZ488514                          |
| 19 | <i>Pseudogymnoascus yunnanensis</i>    | GZUIFR 21.808                | China                 | Soil                         | MZ444073                       | MZ444100                          | MZ490755                             | MZ488538                           | MZ488515                          |
| 20 | <i>Pseudogymnoascus zhejiangensis</i>  | GZUIFR 21.810                | China                 | Soil                         | MZ444075                       | MZ444102                          | MZ490757                             | MZ488540                           | MZ488517                          |
| 21 | <i>Pseudogymnoascus zhejiangensis</i>  | GZUIFR 21.811                | China                 | Soil                         | MZ444076                       | MZ444103                          | MZ490758                             | MZ488541                           | MZ488518                          |
| 22 | <i>Pseudogymnoascus catenatus</i>      | GZUIFR 21.813                | China                 | Soil                         | MZ444078                       | MZ444105                          | MZ490760                             | MZ488543                           | MZ488520                          |
| 23 | <i>Pseudogymnoascus catenatus</i>      | GZUIFR 21.814                | China                 | Soil                         | MZ444079                       | MZ444106                          | MZ490761                             | MZ488544                           | MZ488521                          |
| 24 | <i>Pseudogymnoascus fujianensis</i>    | GZUIFR 21.819                | China                 | Soil                         | MZ444084                       | MZ444111                          | MZ490766                             | MZ488549                           | MZ488526                          |
| 25 | <i>Pseudogymnoascus fujianensis</i>    | GZUIFR 21.820                | China                 | Soil                         | MZ444085                       | MZ444112                          | MZ490767                             | MZ488550                           | MZ488527                          |
| 26 | <i>Pseudogymnoascus guizhouensis</i>   | GZUIFR 376.1                 | China                 | Soil                         | MT509369                       | MT509383                          | MT534209                             | MT534223                           | MT534234                          |
| 27 | <i>Pseudogymnoascus guizhouensis</i>   | GZUIFR 376.2                 | China                 | Soil                         | MT509370                       | MT509384                          | MT534210                             | MT534224                           | MT534235                          |
| 28 | <i>Pseudogymnoascus sinensis</i>       | CGMCC 3.18493(K278)          | China                 | Soil                         | MT509364                       | MT509378                          | MT534204                             | MT534218                           | MT534229                          |
| 29 | <i>Pseudogymnoascus verrucosus</i>     | VKM F-103                    | USA, New York         | Top soil                     | JPKB0100152<br>4<br>(1 to 491) | JPKB010015<br>24<br>(560 to 1413) | JPKB0100175<br>3<br>(13559 to 14177) | JPKB0100174<br>4<br>(6669 to 7432) | JPKB0100178<br>6<br>(12082-12985) |
| 30 | <i>Pseudogymnoascus verrucosus</i>     | UAMH 10579                   | Canada, Alberta       | brown-rotted wood bait block | NR_111197                      | na                                | XM_018270150                         | XM_018270703                       | XM_018277618                      |
| 31 | <i>Pseudogymnoascus antarcticus</i>    | CHFC-EA 569(F09-T2-1)        | Antarctica            | Antarctic marine sponge      | JX845280                       | MN417282                          | MN432493                             | MN418135                           | MN418131                          |

| No | Species                             | Strain                  | Locality              | Substrate /Host         | Accession No. |          |          |          |          |
|----|-------------------------------------|-------------------------|-----------------------|-------------------------|---------------|----------|----------|----------|----------|
|    |                                     |                         |                       |                         | ITS           | LSU      | MCM7     | RPB2     | TEF1     |
| 32 | <i>Pseudogymnoascus australis</i>   | CHFC-EA 567(F09-T18-3)  | Antarctica            | Antarctic marine sponge | MN417287      | MN417284 | MN432491 | MN418137 | MN418133 |
| 33 | <i>Pseudogymnoascus griseus</i>     | CHFC-EA 568(F09-T18-14) | Antarctica            | Antarctic marine sponge | MN417288      | MN417285 | MN432492 | MN418138 | MN418134 |
| 34 | <i>Pseudogymnoascus lanuginosus</i> | CHFC-EA 570(F09-T18-27) | Antarctica            | Antarctic marine sponge | MN417286      | MN417283 | MN418139 | MN418136 | MN418132 |
| 35 | <i>Pseudogymnoascus pannorum</i>    | ATCC 16222              | Germany, West Germany | Soil from wheat field   | AF015789      | na       | KF686777 | na       | KF686766 |
| 36 | <i>Pseudogymnoascus destructans</i> | BW48                    | South Korea           | Myotis petax            | OP420747      | OP420753 | OP450957 | OP450959 | OP450961 |
| 37 | <i>Pseudogymnoascus destructans</i> | BW49                    | South Korea           | Myotis petax            | OP420748      | OP420754 | OP450958 | OP450960 | OP450962 |

## References

1. Minnis, A.M.; Lindner, D.L. Phylogenetic evaluation of Geomyces and allies reveals no close relatives of *Pseudogymnoascus destructans*, comb. nov., in bat hibernacula of eastern North America. *Fungal Biology* **2013**, *117*, 638–649, doi:10.1016/j.funbio.2013.07.001.
2. Villanueva, P.; Vásquez, G.; Gil-Durán, C.; Oliva, V.; Díaz, A.; Henríquez, M.; Álvarez, E.; Laich, F.; Chávez, R.; Vaca, I. Description of the First Four Species of the Genus *Pseudogymnoascus* From Antarctica. *Front Microbiol* **2021**, *12*, 713189, doi:10.3389/fmicb.2021.713189.
3. Zhang, Z.; Dong, C.; Chen, W.; Mou, Q.; Lu, X.; Han, Y.; Huang, J.; Liang, Z. The Enigmatic Thelebolaceae (Thelebolales, Leotiomyces): One New Genus *Solomyces* and Five New Species. *Front Microbiol* **2020**, *11*, 572596, doi:10.3389/fmicb.2020.572596.
4. Zhang, Z.Y.; Shao, Q.Y.; Li, X.; Chen, W.H.; Liang, J.D.; Han, Y.-F.; Huang, J.-Z.; Liang, Z.-Q. Culturable Fungi from Urban Soils in China I: Description of 10 New Taxa. *Microbiology Spectrum* **2021**, *9*, e00867–00821, doi:10.1128/Spectrum.00867-21.
